# Supplementary material for: A rhein-integrated hydrogel dressing with antibacterial, antioxidant and pH-responsive colorimetric properties
Source: Royal Society of Chemistry journal article supplement (doi:10.1039/d6ra03047e), 2026-05-22
Supplement: d6ra03047e1.pdf [file d6ra03047e1.pdf]

1

## Supplementary Information

### 2 A Rhein-Integrated Hydrogel Dressing with Antibacterial, 3 Antioxidant and pH-Responsive Colorimetric Properties

4

5

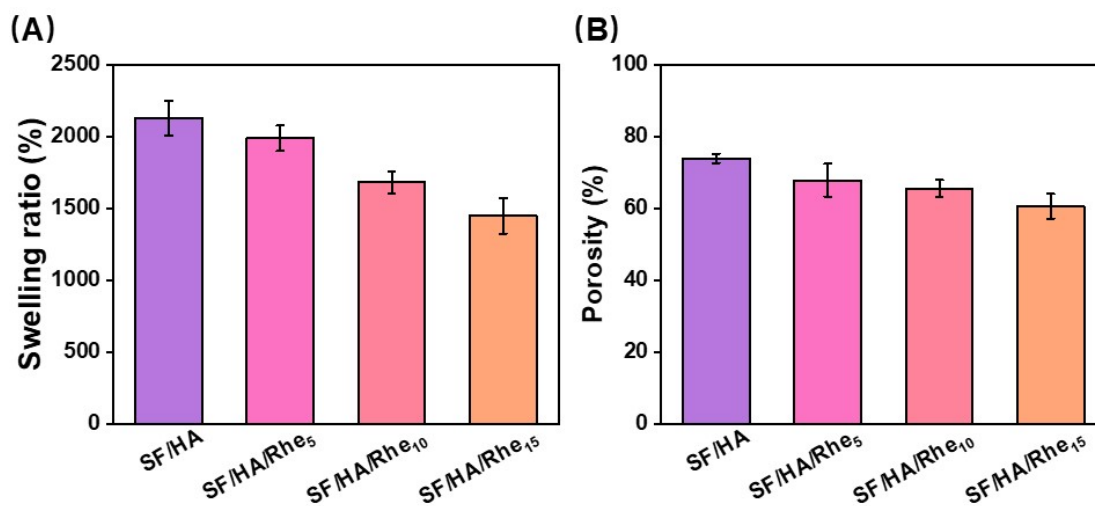

6

7 **Figure S1.** Swelling properties of SF-HA/Rhe hydrogels.

8

9

10

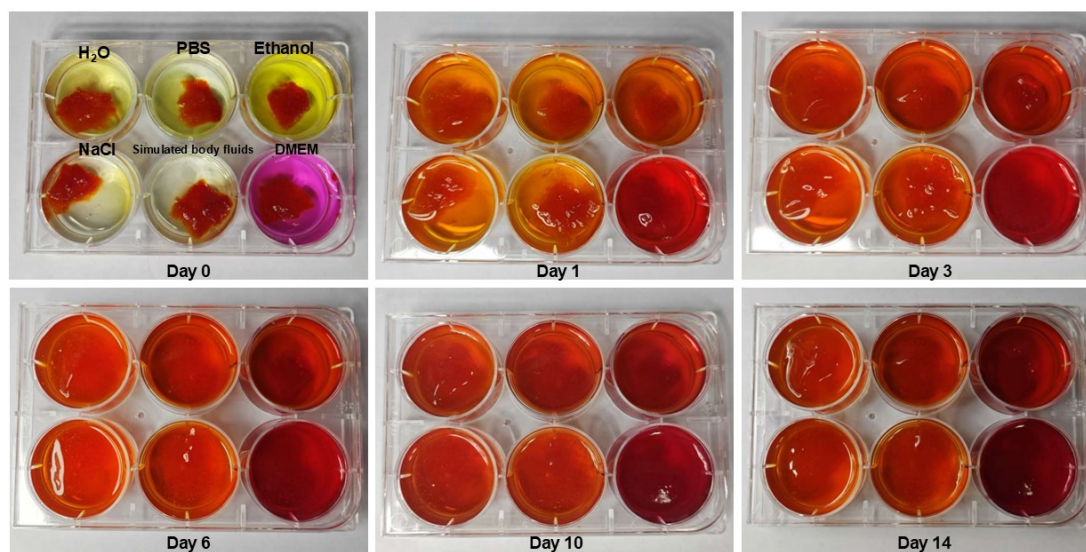

11

12 **Figure S2.** Corresponding images of SF-HA/Rhe hydrogels immersed in different  
13 solutions on days 0, 1, 3, 6, 10, and 14.

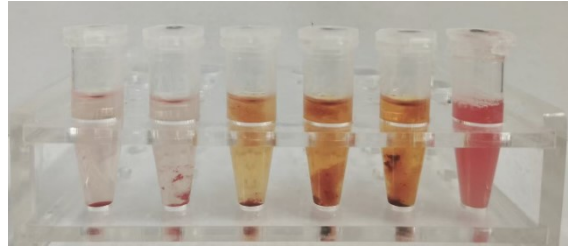

14

15 **Figure S3.** Hemolysis photographs of the hydrogels (from left to right: PBS group, SF-  
16 HA group, SF-HA/Rhe<sub>5</sub>, SF-HA/Rhe<sub>10</sub> and SF-HA/Rhe<sub>15</sub> hydrogel groups and water  
17 group, respectively).

18

19

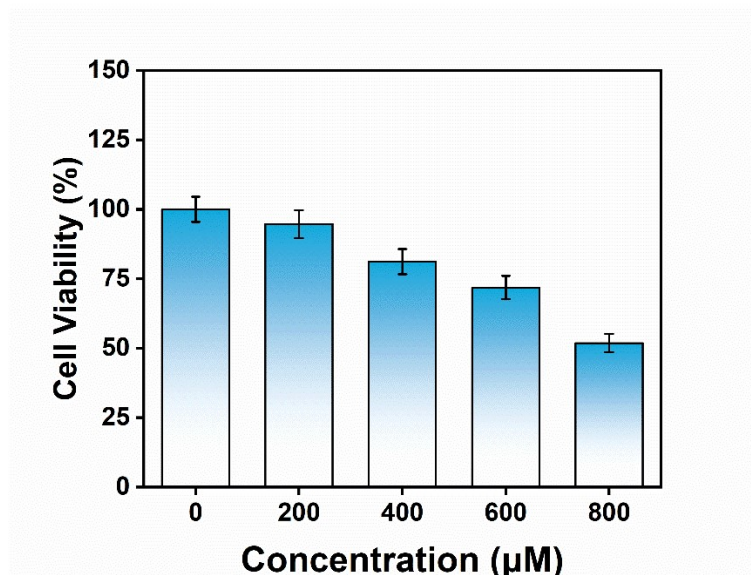

20

21 **Figure S4.** Cell viability of HUVECs treated with different concentrations of H<sub>2</sub>O<sub>2</sub>  
22 for 1 hour.

23

24

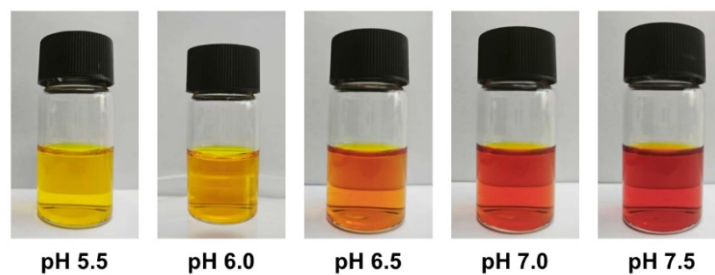

25

26 **Figure S5.** Diagrams of Rhe solutions under different pH conditions.
